# Supplementary material for: Silica microsphere templated self-assembly of a three-dimensional carbon network with stable radio-frequency negative permittivity and low dielectric loss
Source: Royal Society of Chemistry journal article supplement (doi:10.1039/c7tc05911f), 2018-01-01
Supplement: c7tc05911f1.pdf [file c7tc05911f1.pdf]

**Supporting Information for:**

**Silica Microspheres Templated Self-Assembly of Three-dimensional Carbon Network  
with Stable Radio-Frequency Negative Permittivity and Low Dielectric Loss**

Peitao Xie,<sup>a</sup> Zhongyang Wang,<sup>a</sup> Zidong Zhang,<sup>a,\*</sup> Runhua Fan,<sup>b,\*</sup> Chuanbing Cheng,<sup>a,c</sup>

Hu Liu,<sup>d</sup> Yao Liu,<sup>a</sup> Tingxi Li,<sup>e</sup> Chao Yan,<sup>f</sup> Ning Wang,<sup>g</sup> and Zhanhu Guo<sup>e,\*</sup>

<sup>a</sup> Key Laboratory for Liquid-Solid Structural Evolution and Processing of Materials  
(Ministry of Education), Shandong University, Jinan 250061, China

<sup>b</sup> College of Ocean Science and Engineering,

Shanghai Maritime University, Shanghai 201306, China

<sup>c</sup> Integrated Composites Laboratory (ICL),

Department of Chemical and Biomolecular Engineering,

University of Tennessee, Knoxville, Tennessee 37996, USA

<sup>d</sup> National Engineering Research Center for Advanced Polymer Processing Technology,  
Zhengzhou University, Zhengzhou 450002, China

<sup>e</sup> College of Materials Science and Engineering, Shandong University of Science and  
Technology, Qingdao 266590, China

<sup>f</sup> School of Material Science and Engineering, Jiangsu University of Science and Technology  
(JUST), No 2, Mengxi Rd, Zhenjiang, Jiangsu, China

<sup>g</sup> State Key Laboratory of Marine Resource Utilization in South China Sea, Hainan  
University, Haikou 570228, China

\* To whom correspondence should be addressed:

E-mail: zhangzidong@sdu.edu.cn (Z. Zhang),

rhfan@shmtu.edu.cn (R. Fan),

zguo10@utk.edu (Z. Guo)

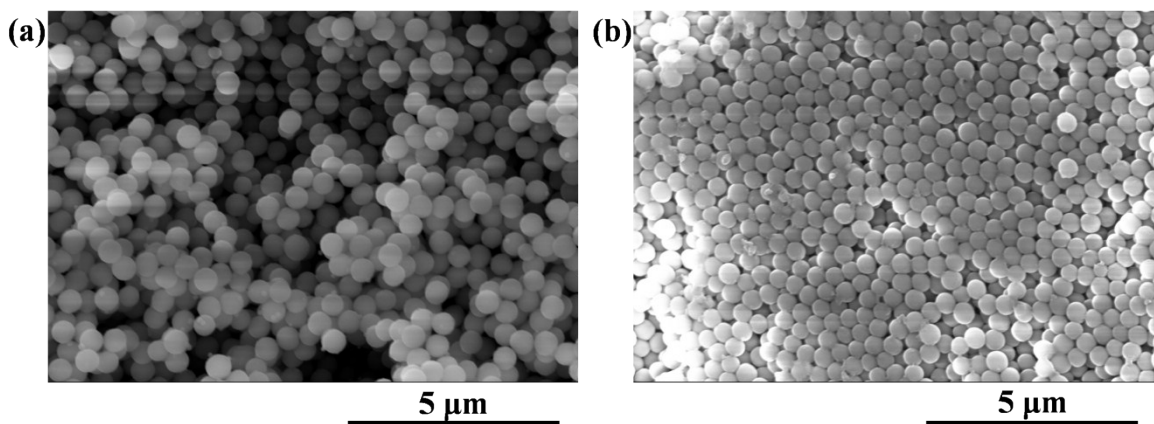

Fig. S1 SEM images of (a) SiO<sub>2</sub> powder and (b) neat SiO<sub>2</sub> bulk sintered at 800 °C for one hour.

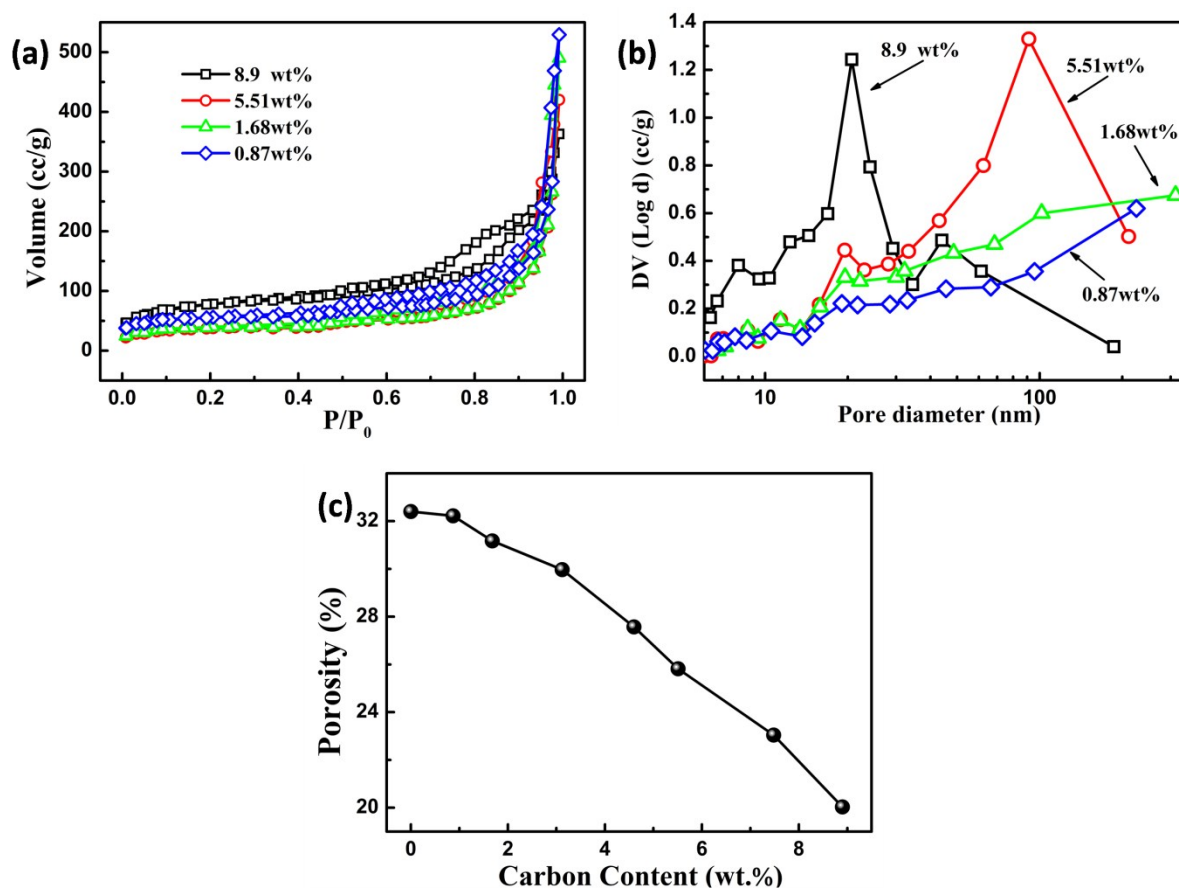

Fig. S2 (a) Nitrogen adsorption-desorption isotherm, (b) pore-size distribution and (c) open porosity of metacomposites with different carbon contents.
